# Supplementary material for: Virulence factors of Moraxella catarrhalis outer membrane vesicles are major targets for cross-reactive antibodies and have adapted during evolution
Source: PubMed Central journal article supplement (PMC5862889; doi:10.1038/s41598-018-23029-7), 2018-03-21
Supplement: 41598_2018_23029_MOESM1_ESM.pdf [file 41598_2018_23029_MOESM1_ESM.pdf]

## Supplementary File: Tables and Figures

### Virulence factors of *Moraxella catarrhalis* outer membrane vesicles are major targets for cross-reactive antibodies and have adapted during evolution

Daria Augustyniak<sup>a\*</sup>, Rafał Seredyński<sup>b,c</sup>, Siobhán McClean<sup>d</sup>, Justyna Roszkowiak<sup>a</sup>, Bartosz Roszniowski<sup>a</sup>, Darren L. Smith<sup>e</sup>, Zuzanna Drulis-Kawa<sup>a</sup>, Paweł Mackiewicz<sup>f\*</sup>

(a) Department of Pathogen Biology and Immunology, Institute of Genetics and Microbiology, University of Wrocław, Przybyszewskiego 63/77, 51-148 Wrocław, Poland

E mail: [daria.augustyniak@uwr.edu.pl](mailto:daria.augustyniak@uwr.edu.pl)

Email: [justyna.roszkowiak@uwr.edu.pl](mailto:justyna.roszkowiak@uwr.edu.pl)

Email: [bartosz.roszniowski@uwr.edu.pl](mailto:bartosz.roszniowski@uwr.edu.pl)

Email: [zuzanna.drulis-kawa@uwr.edu.pl](mailto:zuzanna.drulis-kawa@uwr.edu.pl)

(b) Department of Physiology, Wrocław Medical University, T. Chalubinskiego 10, 50-368 Wrocław, Poland

(c) Department of Physical Chemistry of Microorganisms, Institute of Genetics and Microbiology, University of Wrocław, Przybyszewskiego 63/77, 51-148 Wrocław, Poland

E-mail: [rafal.seredynski@umed.wroc.pl](mailto:rafal.seredynski@umed.wroc.pl)

(d) School of Biomolecular and Biomedical Sciences, UCD O'Brien Centre for Science West B304, Dublin, Ireland

E-mail: [siobhan.mcclean@ucd.ie](mailto:siobhan.mcclean@ucd.ie)

(e) Applied Sciences, University of Northumbria, Ellison Building EBD222, Newcastle upon Tyne NE1 8ST, UK

E-mail: [darren.smith@northumbria.ac.uk](mailto:darren.smith@northumbria.ac.uk)

(f) Department of Genomics, Faculty of Biotechnology, University of Wrocław, Joliot-Curie 14a, 50-383 Wrocław, Poland

E-mail: [pamac@smorfland.uni.wroc.pl](mailto:pamac@smorfland.uni.wroc.pl)

\* Corresponding authors:

[daria.augustyniak@uwr.edu.pl](mailto:daria.augustyniak@uwr.edu.pl), Tel: +48 71 37 56 296 (D. Augustyniak)

[pamac@smorfland.uni.wroc.pl](mailto:pamac@smorfland.uni.wroc.pl), Tel: +48 71 37 56 331 (P. Mackiewicz)

**Supplementary Table S1.** Characteristics of newly sequenced genomes from four *M. catarrhalis* strains.

| Characteristics                   | <i>Moraxella catarrhalis</i> genome |               |             |             |
|-----------------------------------|-------------------------------------|---------------|-------------|-------------|
|                                   | <b>Mc1</b>                          | <b>Mc5</b>    | <b>Mc6</b>  | <b>Mc8</b>  |
| Accession number                  | CP010573                            | CP010900      | CP010901    | CP010902    |
| Total % of trimmed contigs        | 0.06                                | 16.91         | 7.55        | 0.05        |
| Total bp after trimming           | 952,873,918                         | 1,060,357,667 | 958,836,852 | 954,456,191 |
| Total reads after trimming        | 4,777,572                           | 5,014,740     | 4,393,940   | 5,698,340   |
| Average read length               | 199.4                               | 211.4         | 219.9       | 289.5       |
| Reference genome accession number | CP002005.1                          | NC_014147.1   | CP007669.1  | MC1         |
| <i>De novo</i> assembly contigs   | 256                                 | 113           | 395         | 251         |
| Average contig size               | 7,983                               | 5,621         | 5,309       | 7,946       |
| N50 contig                        | 90,957                              | 98,344        | 78,381      | 93,356      |
| Largest contig                    | 215,285                             | 174,662       | 279,058     | 323,133     |
| Number of contigs after stitching | 5                                   | 4             | 3           | 4           |
| Total length (bp) of genome       | 1,843,517                           | 1,852,323     | 1,839,052   | 1,849,375   |
| Number of genes                   | 1699                                | 1710          | 1683        | 1696        |
| GC% content                       | 41.7                                | 41.7          | 41.8        | 41.8        |

**Supplementary Table S2.** *Moraxella* and *Acinetobacter* genomes used in the study. The number of all annotated protein-coding genes as well as genes classified into orthologous groups by OrthoMCL and ungrouped genes are shown.

| Organism                                   | Accession number | Total protein-coding genes | Genes in orthologous groups | Ungrouped genes |
|--------------------------------------------|------------------|----------------------------|-----------------------------|-----------------|
| <i>Acinetobacter calcoaceticus</i> PHEA-2  | GCF000191145.1   | 3599                       | 3302                        | 297             |
| <i>Acinetobacter oleivorans</i> DR1        | GCF000196795.1   | 3786                       | 3415                        | 371             |
| <i>Acinetobacter</i> sp. 114               | GCF001307195.1   | 2679                       | 2245                        | 434             |
| <i>Moraxella boevrei</i> DSM 14165         | GCF000379845.1   | 2220                       | 1934                        | 286             |
| <i>Moraxella bovoculi</i> 237              | GCF000696305.1   | 1820                       | 1640                        | 180             |
| <i>Moraxella caprae</i> DSM 19149          | GCF000426885.1   | 2320                       | 1897                        | 423             |
| <i>Moraxella catarrhalis</i> 101P30B1      | GCF000193065.1   | 1634                       | 1633                        | 1               |
| <i>Moraxella catarrhalis</i> 103P14B1      | GCF000192925.1   | 1709                       | 1696                        | 13              |
| <i>Moraxella catarrhalis</i> 12P80B1       | GCF000192965.1   | 1727                       | 1562                        | 165             |
| <i>Moraxella catarrhalis</i> 157.rep1_MCAT | GCF001062845.1   | 1707                       | 1707                        | 0               |
| <i>Moraxella catarrhalis</i> 157.rep2_MCAT | GCF001062815.1   | 1709                       | 1709                        | 0               |
| <i>Moraxella catarrhalis</i> 25240         | GCF000740455.1   | 1678                       | 1675                        | 3               |
| <i>Moraxella catarrhalis</i> 304_MCAT      | GCF001064405.1   | 1766                       | 1764                        | 2               |
| <i>Moraxella catarrhalis</i> 324_MCAT      | GCF001064535.1   | 1769                       | 1765                        | 4               |
| <i>Moraxella catarrhalis</i> 339_MCAT      | GCF001064655.1   | 1657                       | 1654                        | 3               |
| <i>Moraxella catarrhalis</i> 340_MCAT      | GCF001064665.1   | 1652                       | 1652                        | 0               |
| <i>Moraxella catarrhalis</i> 46P47B1       | GCF000192945.1   | 1629                       | 1625                        | 4               |
| <i>Moraxella catarrhalis</i> 489_MCAT      | GCF001063475.1   | 1583                       | 1583                        | 0               |
| <i>Moraxella catarrhalis</i> 611_MCAT      | GCF001065625.1   | 1598                       | 1597                        | 1               |
| <i>Moraxella catarrhalis</i> 613_MCAT      | GCF001065675.1   | 1591                       | 1590                        | 1               |
| <i>Moraxella catarrhalis</i> 7169          | GCF000192905.1   | 1688                       | 1686                        | 2               |
| <i>Moraxella catarrhalis</i> ATCC 25239    | GCF000766665.1   | 1639                       | 1637                        | 2               |
| <i>Moraxella catarrhalis</i> BBH18         | GCF000092265.1   | 1621                       | 1620                        | 1               |
| <i>Moraxella catarrhalis</i> BC1           | GCF000192985.1   | 1700                       | 1697                        | 3               |
| <i>Moraxella catarrhalis</i> BC7           | GCF000193005.1   | 1675                       | 1649                        | 26              |
| <i>Moraxella catarrhalis</i> BC8           | GCF000193025.1   | 1681                       | 1676                        | 5               |
| <i>Moraxella catarrhalis</i> CO72          | GCF000193045.1   | 1728                       | 1722                        | 6               |
| <i>Moraxella catarrhalis</i> MC1           | CP010573.1       | 1589                       | 1588                        | 1               |
| <i>Moraxella catarrhalis</i> MC5           | CP010900.1       | 1604                       | 1604                        | 0               |
| <i>Moraxella catarrhalis</i> MC6           | CP010901.1       | 1581                       | 1579                        | 2               |
| <i>Moraxella catarrhalis</i> MC8           | CP010902.1       | 1580                       | 1578                        | 2               |
| <i>Moraxella catarrhalis</i> O35E          | GCF000193085.1   | 1544                       | 1544                        | 0               |
| <i>Moraxella catarrhalis</i> RH4           | GCF000302495.1   | 1609                       | 1605                        | 4               |
| <i>Moraxella macacae</i> O408225           | GCF000320365.1   | 1805                       | 1691                        | 114             |

**Supplementary Table S3.** Percentage of OMV proteins and other proteins from *Moraxella catarrhalis* in their given functional categories of Cluster of Orthologous Groups (COGs). P-value of proportion test comparing the number of proteins was corrected by Benjamini–Hochberg procedure. In total 1673 such OMV proteins were found with 48,621 other proteins.

| Functional category                                                       | OMVs  | non-OMV | P-value     |
|---------------------------------------------------------------------------|-------|---------|-------------|
| Amino acid transport and metabolism                                       | 5.56  | 9.20    | 9.0887E-07  |
| Carbohydrate transport and metabolism                                     | 4.06  | 2.24    | 2.86218E-06 |
| Cell cycle control, cell division, chromosome partitioning / Cytoskeleton | 3.53  | 1.54    | 1.02204E-09 |
| Cell wall/membrane/envelope biogenesis                                    | 14.94 | 6.04    | 1.96064E-47 |
| Cell motility and secretion                                               | 0.00  | 0.84    | 0.0004      |
| Chromatin structure and dynamics                                          | 0.00  | 0.06    | 0.6121      |
| Coenzyme transport and metabolism                                         | 0.00  | 7.14    | 1.27593E-28 |
| Defence mechanisms                                                        | 0.00  | 1.66    | 4.42432E-07 |
| DNA replication, recombination and repair                                 | 0.12  | 6.51    | 3.75724E-25 |
| Energy production and conversion                                          | 5.92  | 7.37    | 0.0361      |
| Extracellular structures                                                  | 1.49  | 0.00    | 4.9528E-146 |
| Function unknown                                                          | 7.47  | 8.32    | 0.2773      |
| General function prediction only                                          | 11.06 | 10.15   | 0.2773      |
| Inorganic ion transport and metabolism                                    | 10.46 | 5.40    | 5.11772E-18 |
| Intracellular trafficking, secretion and vesicular transport              | 3.53  | 3.05    | 0.3271      |
| Lipid transport and metabolism                                            | 2.03  | 3.46    | 0.0028      |
| Nucleotide transport and metabolism                                       | 0.00  | 3.47    | 5.18827E-14 |
| Posttranslational modification, protein turnover, chaperones              | 8.31  | 5.72    | 1.89006E-05 |
| RNA processing and modification                                           | 0.00  | 0.07    | 0.5552      |
| Secondary metabolites biosynthesis, transport and catabolism              | 3.77  | 1.27    | 3.05896E-17 |
| Signal transduction mechanisms                                            | 0.00  | 2.35    | 1.02204E-09 |
| Transcription                                                             | 5.74  | 3.92    | 0.0004      |
| Translation, ribosomal structure and biogenesis                           | 12.01 | 10.22   | 0.0264      |

**Supplementary Table S4.** Percentage of annotated protein sequences unique for *Moraxella catarrhalis* (Mcat) and unique for other *Moraxella* species (Msp) in given functional categories of Cluster of Orthologous Groups (COGs). P-value of proportion test comparing the number of proteins was corrected by Benjamini–Hochberg procedure. In total 2611 such proteins were found in *Moraxella catarrhalis* and 2162 in other *Moraxella* species.

| Functional category                                                       | Mcat  | Msp   | P-value  |
|---------------------------------------------------------------------------|-------|-------|----------|
| Amino acid transport and metabolism                                       | 14.82 | 5.41  | 1.13E-24 |
| Carbohydrate transport and metabolism                                     | 1.00  | 4.35  | 1.31E-12 |
| Cell cycle control, cell division, chromosome partitioning / Cytoskeleton | 0.23  | 2.08  | 3.93E-09 |
| Cell wall/membrane/envelope biogenesis                                    | 4.90  | 8.37  | 3.67E-06 |
| Cell motility and secretion                                               | 0.61  | 6.52  | 2.52E-28 |
| Chromatin structure and dynamics                                          | 0.00  | 0.05  | 0.9687   |
| Coenzyme transport and metabolism                                         | 7.35  | 1.57  | 1.03E-19 |
| Defence mechanisms                                                        | 7.77  | 2.54  | 1.32E-14 |
| DNA replication, recombination and repair                                 | 3.56  | 5.13  | 0.0146   |
| Energy production and conversion                                          | 1.38  | 2.08  | 0.0962   |
| Extracellular structures                                                  | 0.04  | 0.00  | 1.0000   |
| Function unknown                                                          | 10.88 | 12.63 | 0.0872   |
| General function prediction only                                          | 17.85 | 13.41 | 7.05E-05 |
| Inorganic ion transport and metabolism                                    | 9.65  | 5.55  | 4.69E-07 |
| Intracellular trafficking, secretion and vesicular transport              | 1.88  | 7.45  | 1.03E-19 |
| Lipid transport and metabolism                                            | 4.14  | 2.73  | 0.0156   |
| Nucleotide transport and metabolism                                       | 1.42  | 0.46  | 0.0025   |
| Posttranslational modification, protein turnover, chaperones              | 1.42  | 2.17  | 0.0848   |
| Secondary metabolites biosynthesis, transport and catabolism              | 1.26  | 2.64  | 0.0014   |
| Signal transduction mechanisms                                            | 3.45  | 7.91  | 7.22E-11 |
| Transcription                                                             | 6.01  | 6.34  | 0.7560   |
| Translation, ribosomal structure and biogenesis                           | 0.38  | 0.60  | 0.4424   |

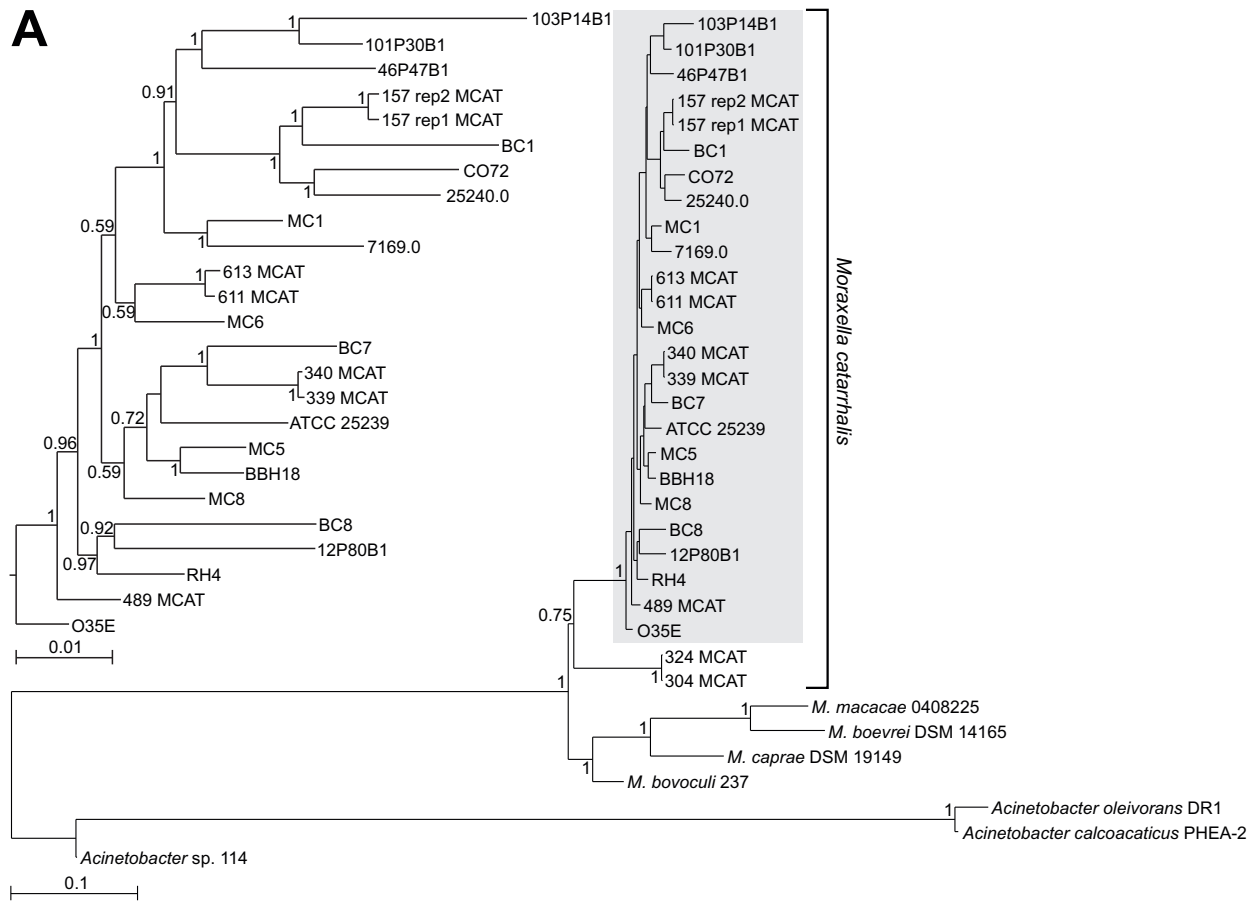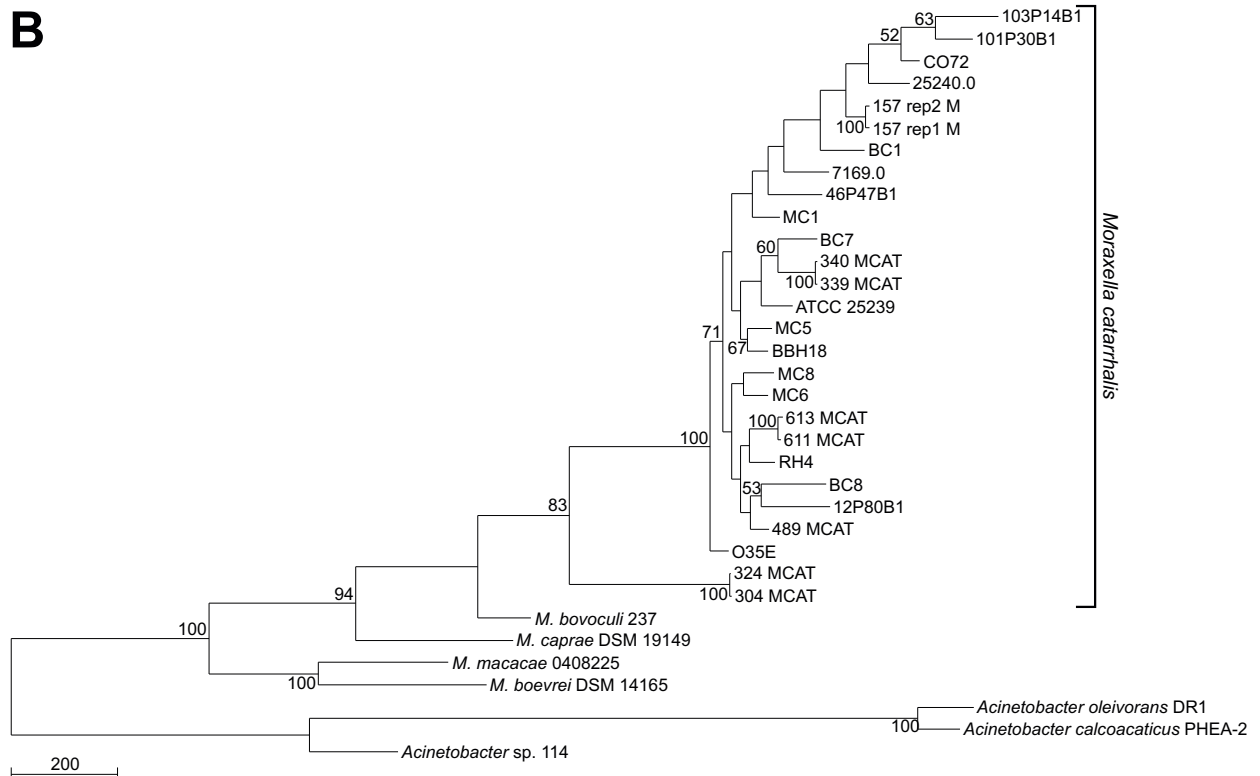

**Supplementary Fig. S1.** Trees based on the presence and absence of orthologous groups of proteins found by OrthoMCL in 31 *Moraxella* genomes and three members of *Acinetobacter* genus. A. The Bayesian tree constructed in MrBayes. The part of tree marked by the grey rectangle is shown on the left in the larger scale. Numbers at nodes correspond to posterior probabilities. Values larger than 0.5 are only shown. B. Maximum parsimony tree found in PAUP\*. Numbers at nodes correspond to bootstrap values. Only values larger than 50% are shown.

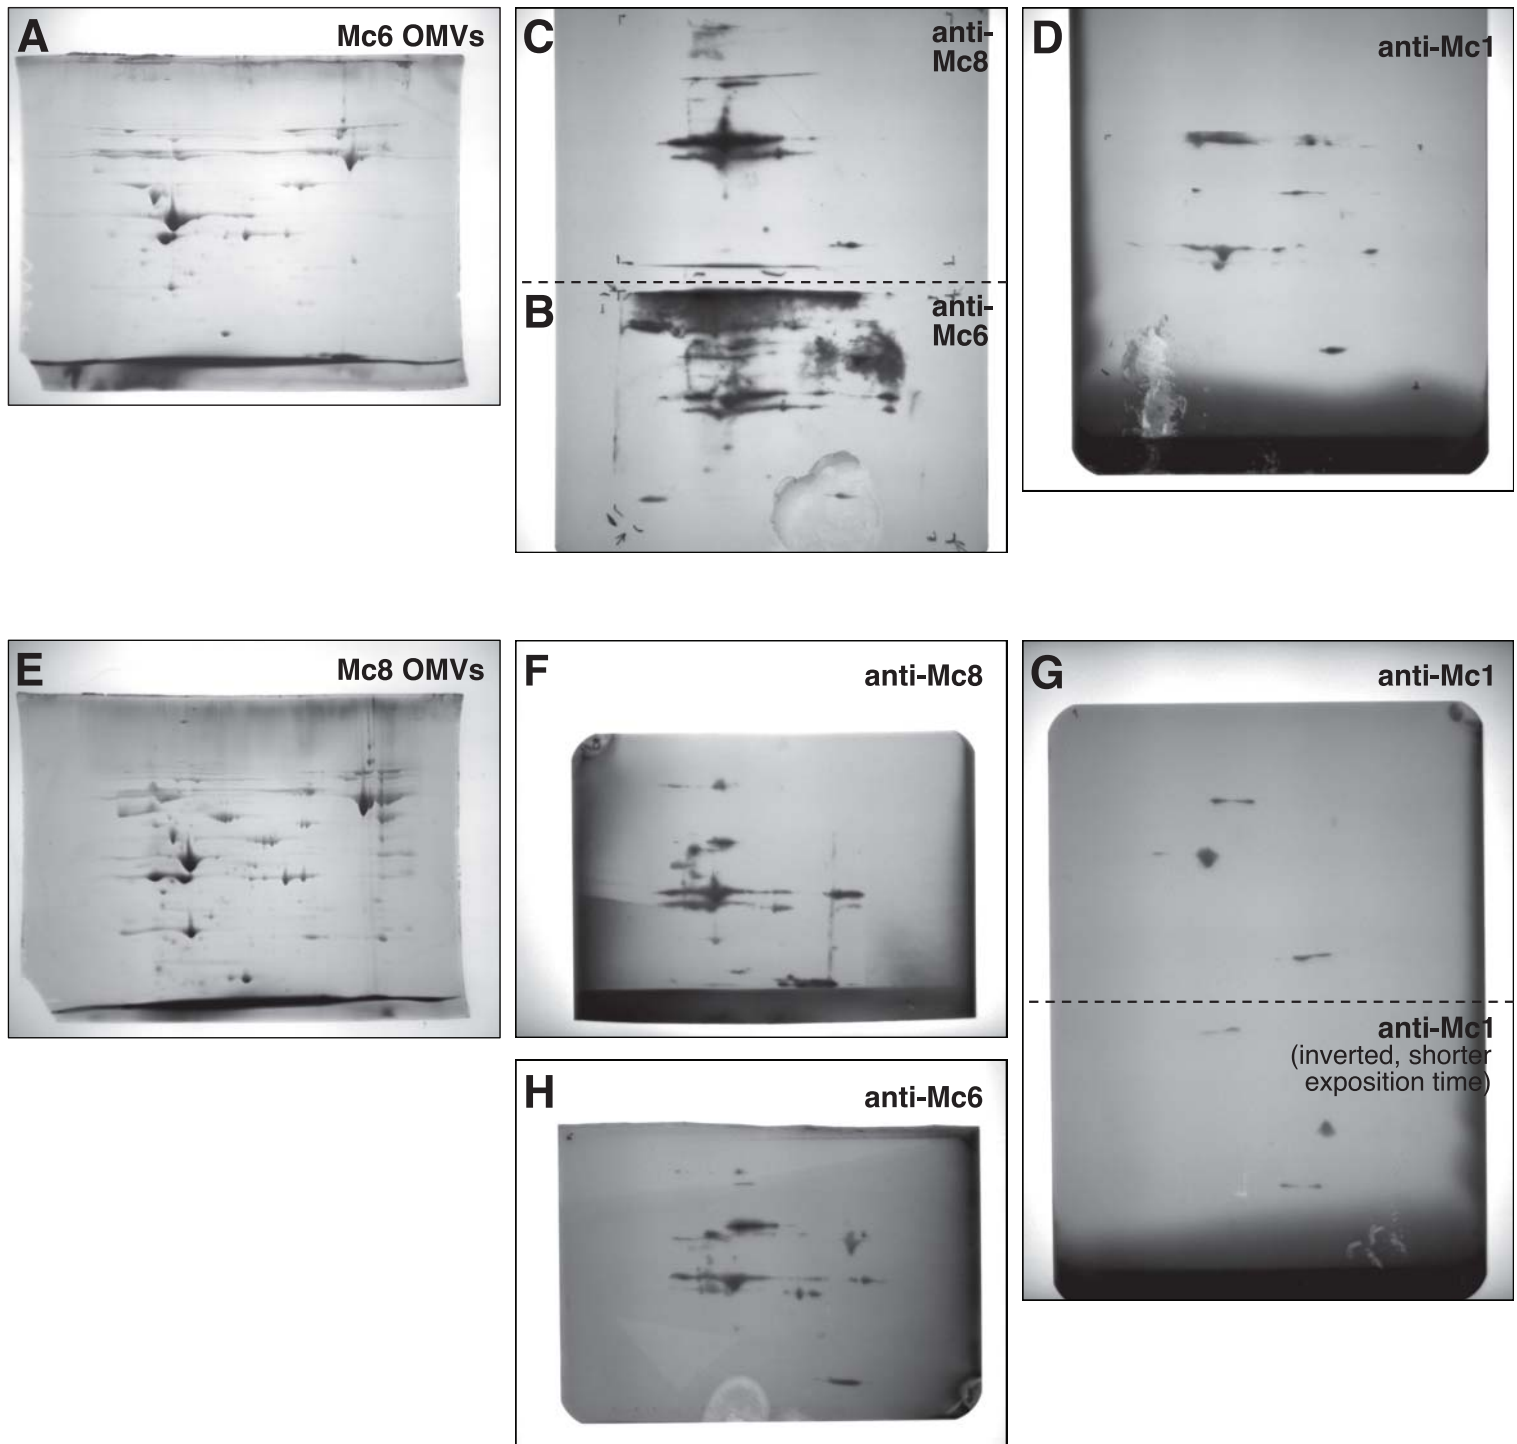

**Supplementary Fig. S2.** Original images of two-dimensional gels and blots, acquired with G:BOX system (Syngene Inc.); all the X-ray films (B-D, F, G and the upper part of H) were exposed to the chemiluminescent substrate for the exactly same time. Immunoblot images were used for semi-quantitative intensity analysis. Cropped versions with adjusted brightness and contrast are included in the Figure 2. (A, E) 2D-gel electrophoresis OMV proteins visualized by Coomassie staining; (B, F) 2D immunoblots probed with homologous antisera; (C, G) immunoblots probed with stronger cross-reactive antisera; (D, H) immunoblots probed with weaker cross-reactive antisera.

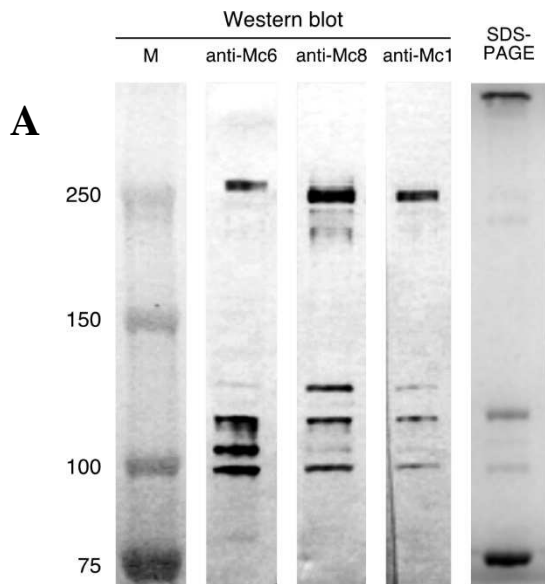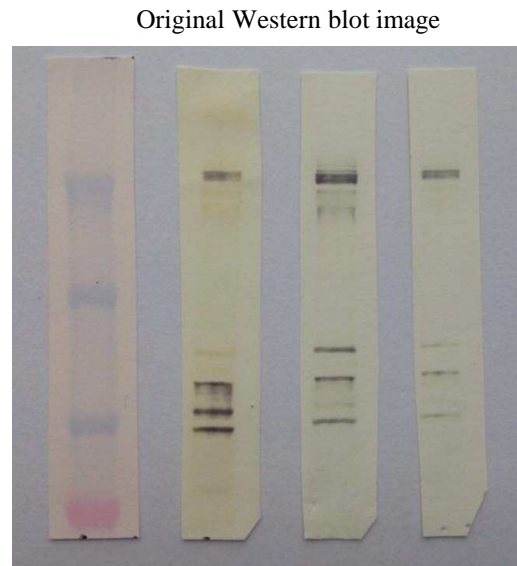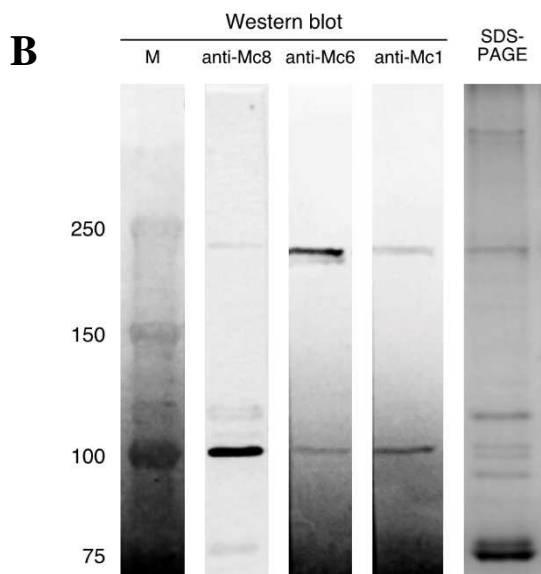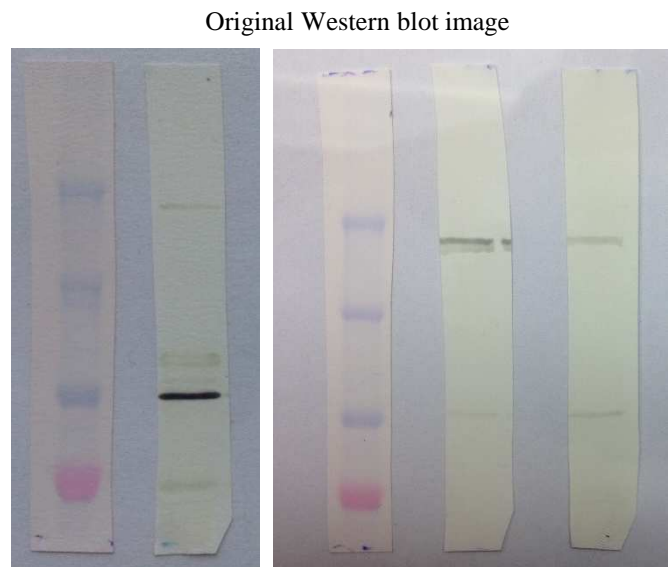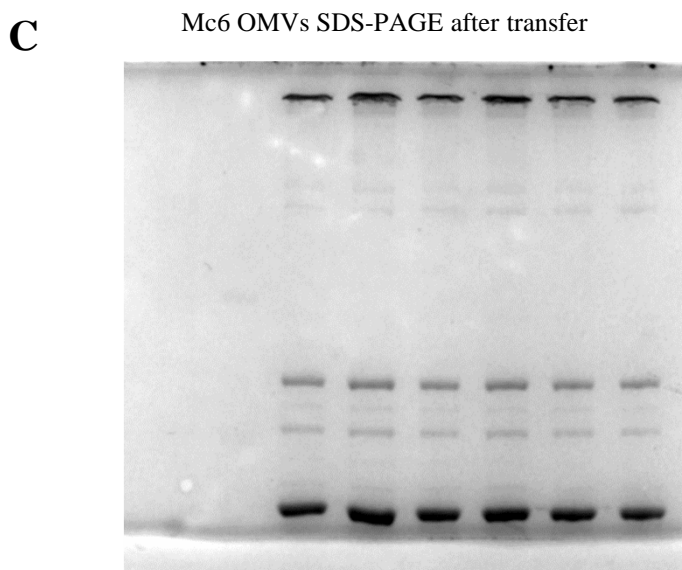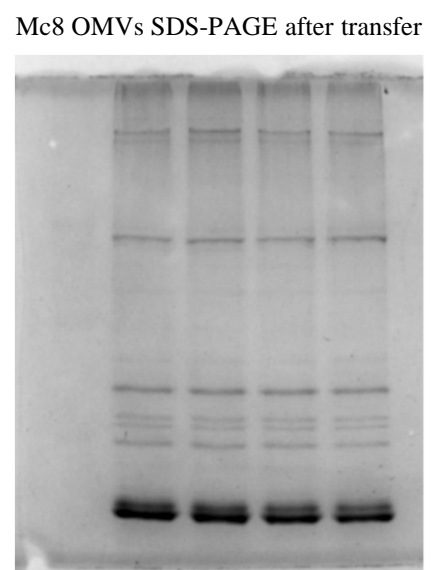



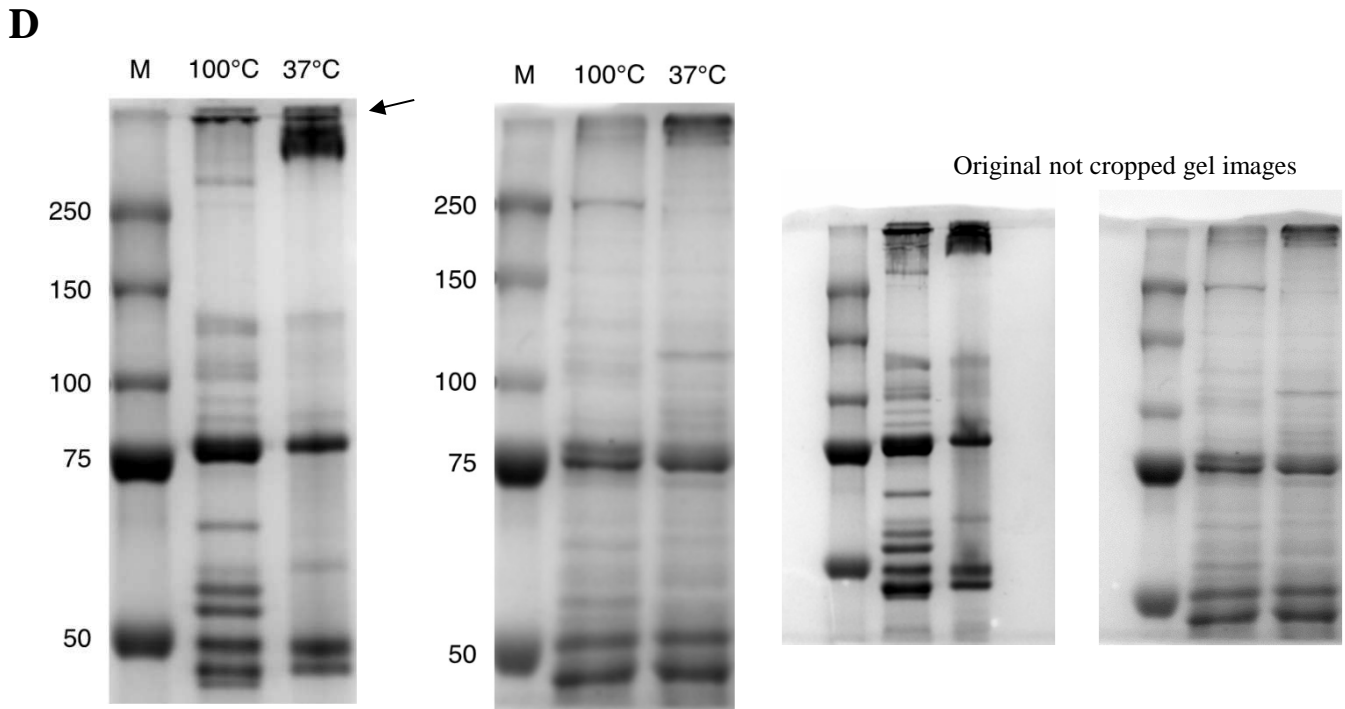

**Supplementary Fig. S3.** Analyses of high molecular weight antigens (HMW) carried by *Moraxella catarrhalis* OMVs. Western blot-based detection of HMW antigens of Mc6 OMVs (A) and Mc8 OMVs (B). Equal amount of proteins were resolved by 6% SDS-PAGE and analysed using indicated murine antisera and anti-Fc $\gamma$  conjugate. The strong reactivity for ~ 250 kDa HMW antigen, presumably Hag/MID is shown. The color blots refer to original images before white and black adjustments. Molecular markers in kDa are shown on stained immobilon P on the left side of the blot set. (C) original not cropped 6% SDS-PAGE gels of Mc6 OMVs (left panel) and Mc8 OMVs (right panel), after transfer stained with Coomassie (D) 8% SDS-PAGE of OMVs Mc6 (left panel) and OMVs Mc8 (middle panel) heated for 10 min in indicated temperatures to show the presence of HMW antigen (indicated by arrow) and its resistance to heating that is typical for UspA2, only for Mc6. The original not cropped gel images are presented in the right panel.

**CopB: MC1\_SP69\_02275**

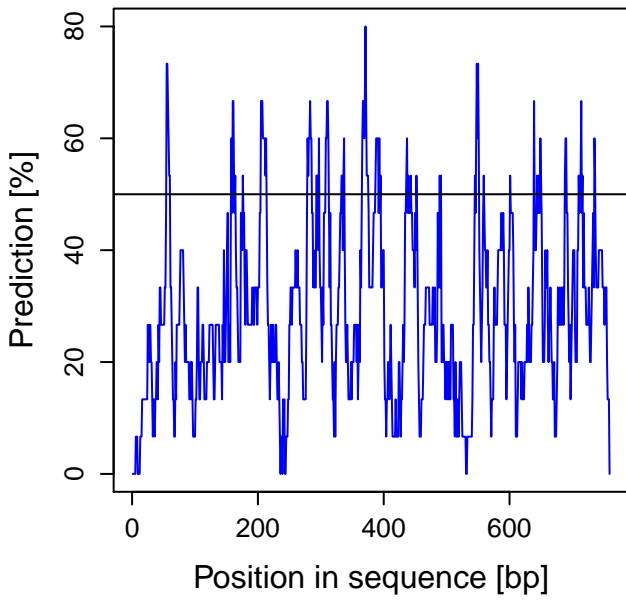

**CopB: MC6\_SQ01\_06490**

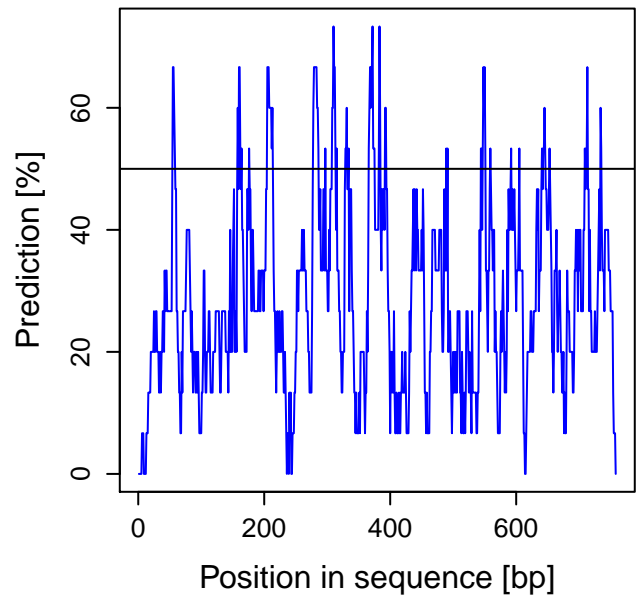

**CopB: MC8\_SQ02\_06550**

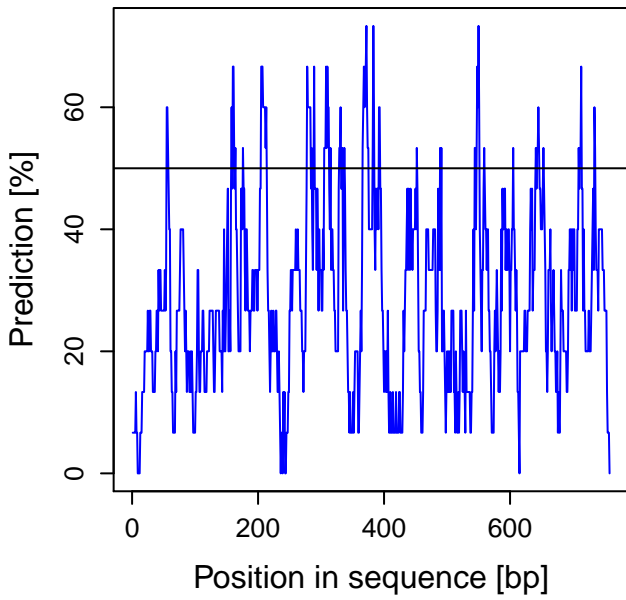

**FbpA: MC1\_SP69\_01350,  
MC8\_SQ02\_07515**

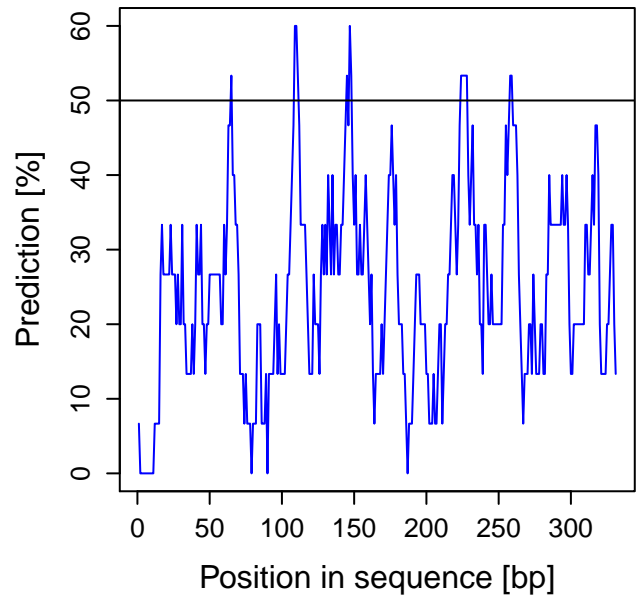

**FbpA: MC6\_SQ01\_07425**

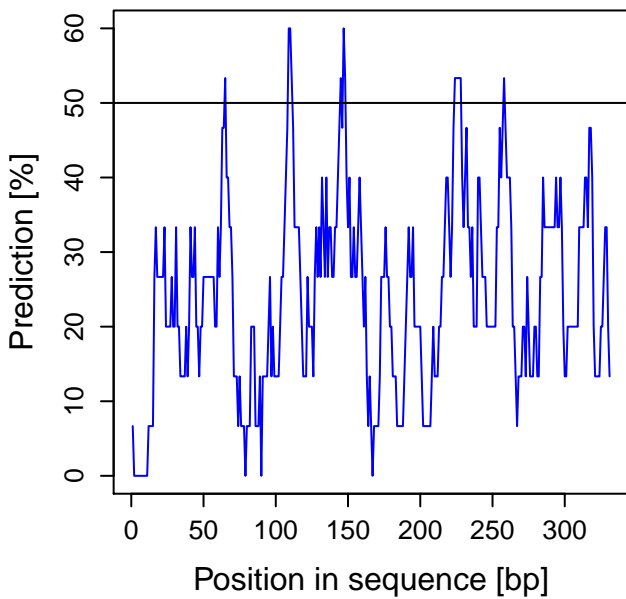

**GroEL: MC1\_SP69\_06775,  
MC6\_SQ01\_02125**

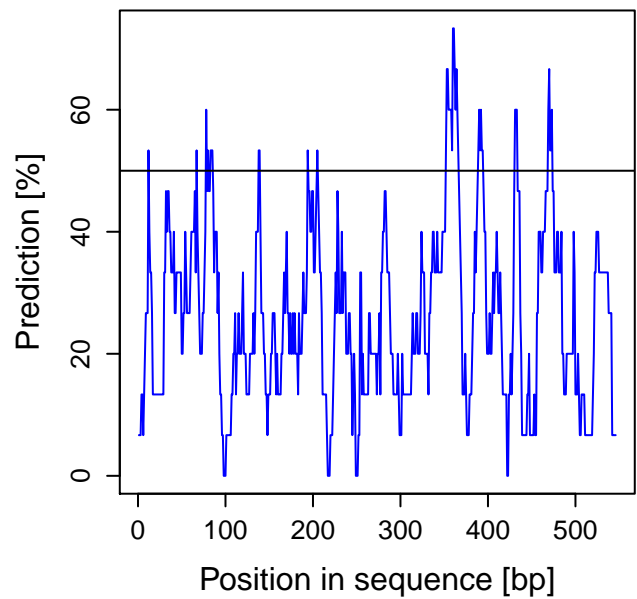

**GroEL: MC8\_SQ02\_02135**

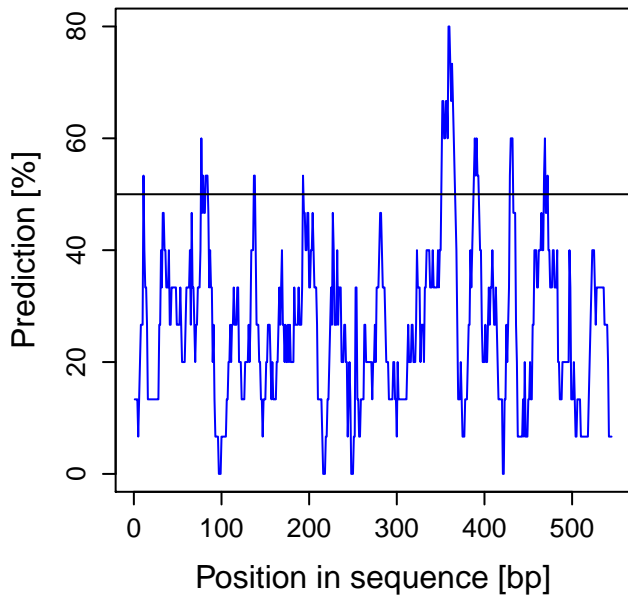

**Hag\_MID: MC1\_SP69\_02795**

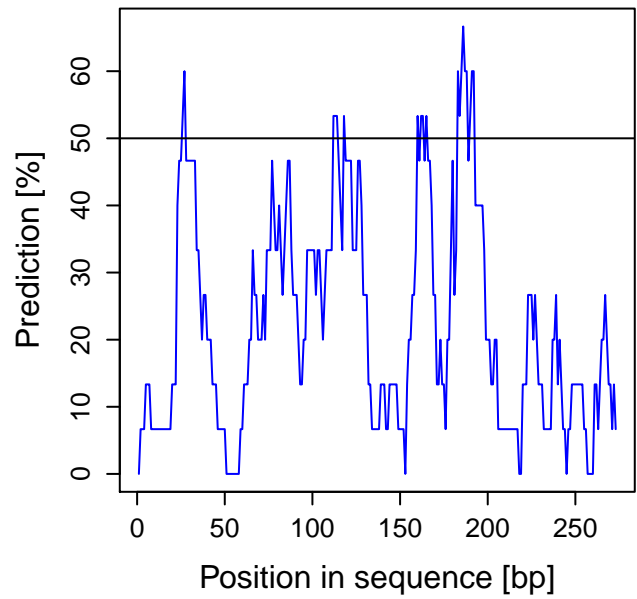

**Hag\_MID: MC1\_SP69\_02800**

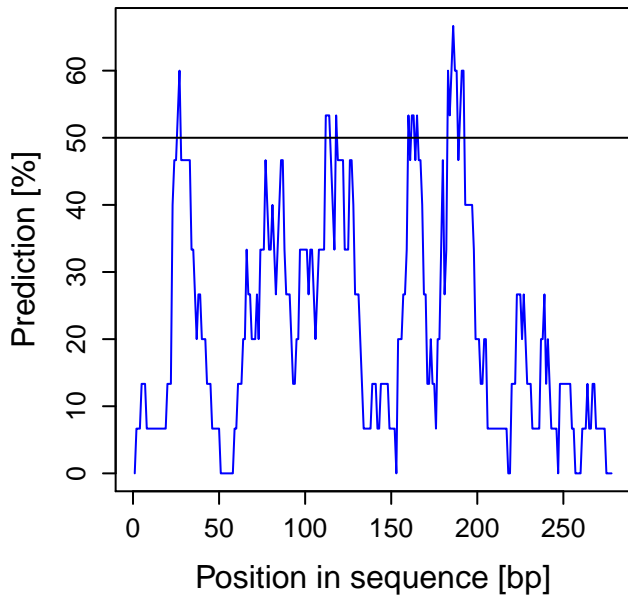

**Hag\_MID: MC6\_SQ01\_06005**

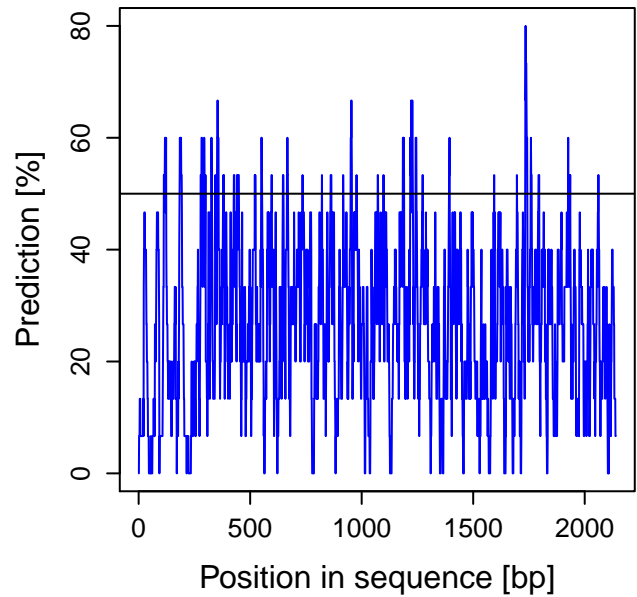

**Hp\_Mc4: MC1\_SP69\_05565,  
MC8\_SQ02\_03345**

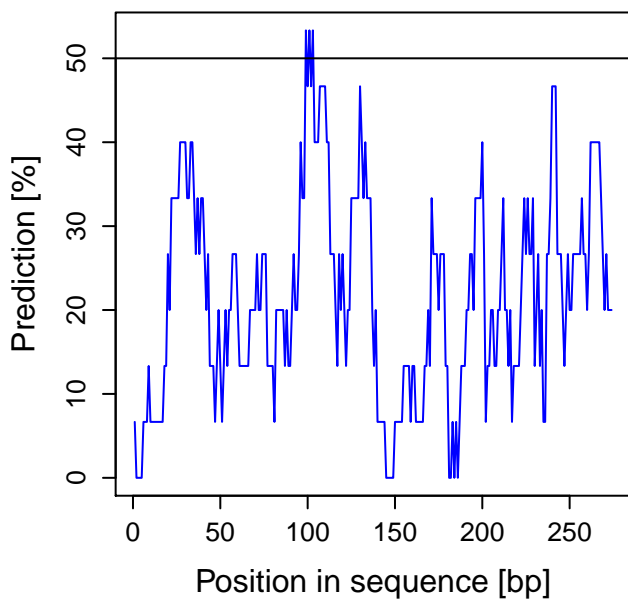

**Hp\_Mc4: MC6\_SQ01\_03330**

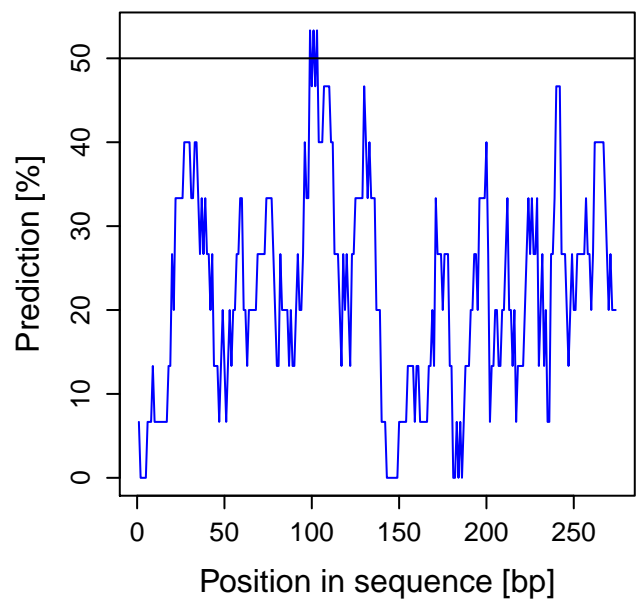

**LbpB: MC1\_SP69\_00975**

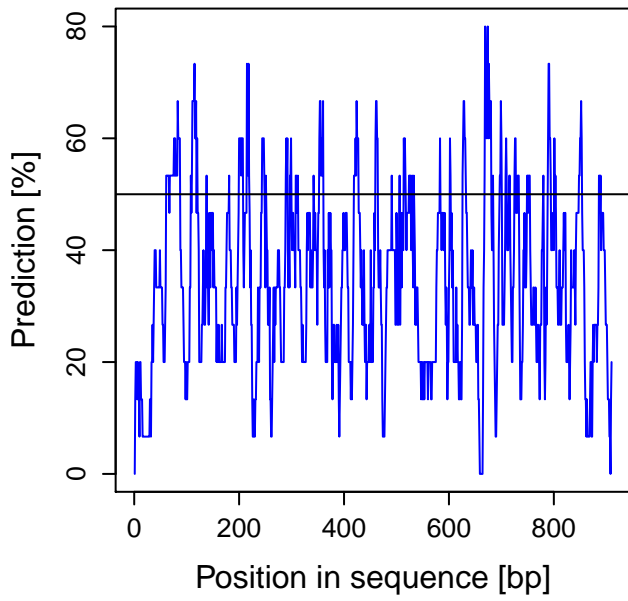

**LbpB: MC6\_SQ01\_07800**

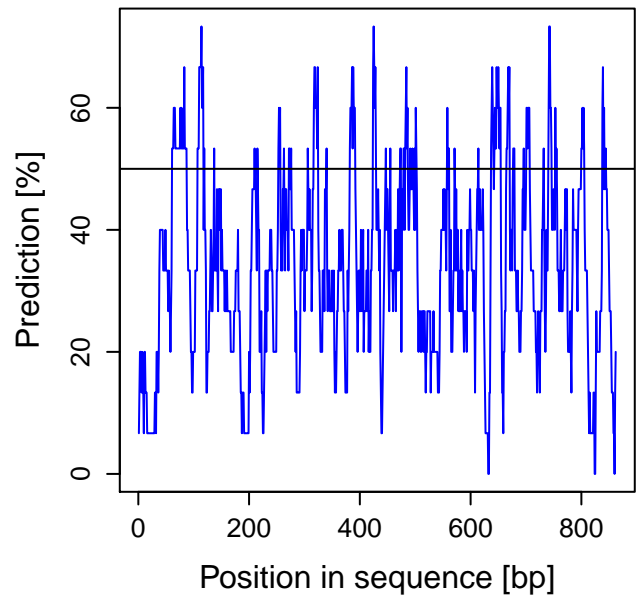

**LbpB: MC8\_SQ02\_07885**

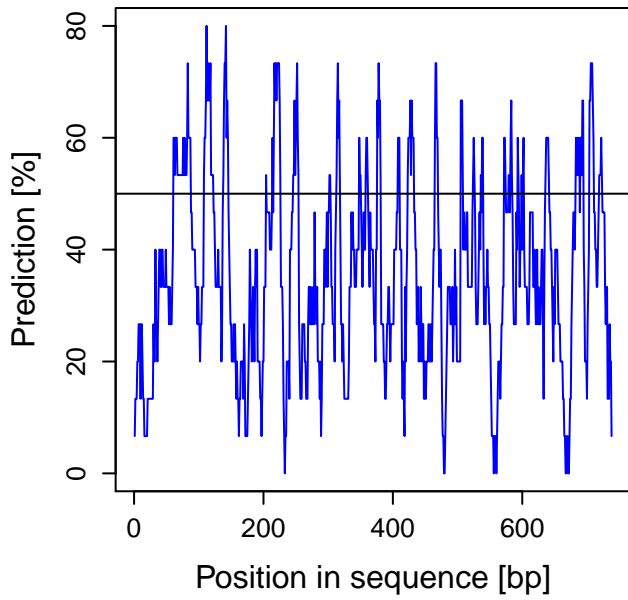

**Lpd: MC1\_SP69\_00335,  
MC6\_SQ01\_00050**

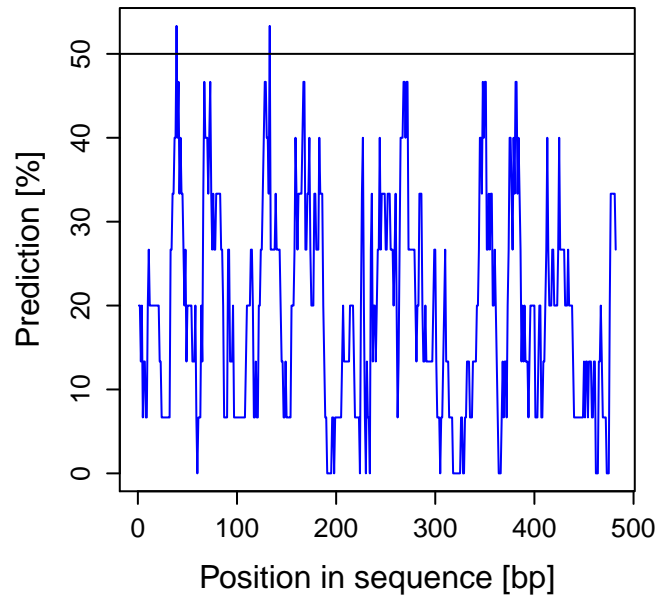

**Lpd: MC8\_SQ02\_00050**

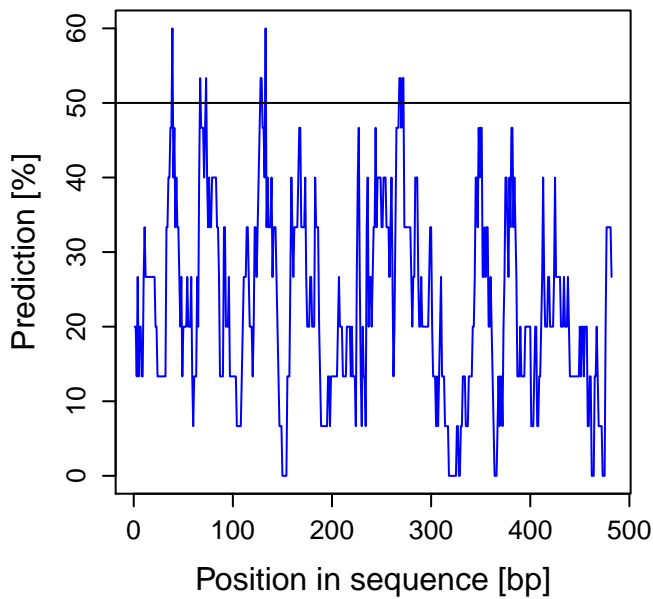

**MhuA: MC1\_SP69\_03305**

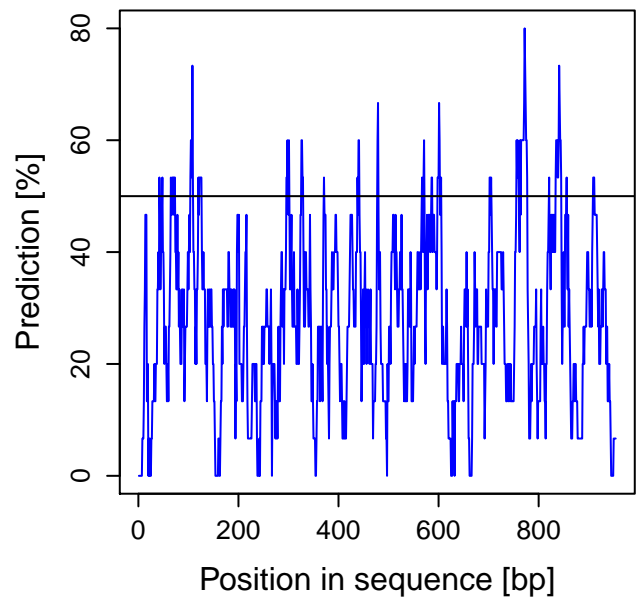

**MhuA: MC6\_SQ01\_05485**

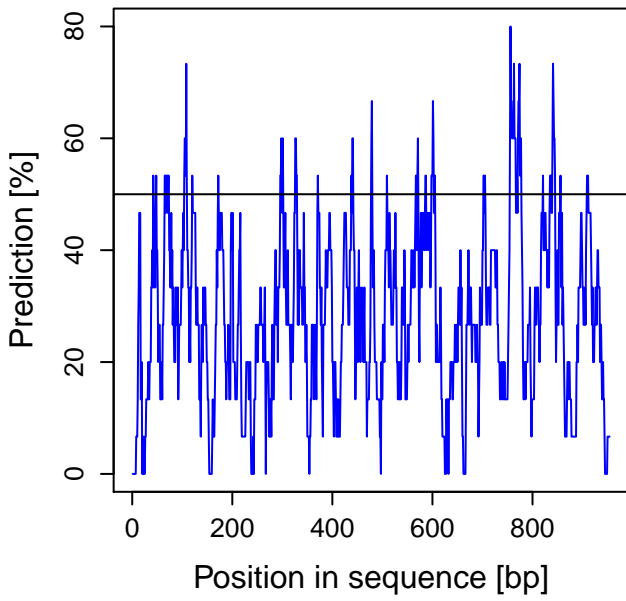

**MhuA: MC8\_SQ02\_05535**

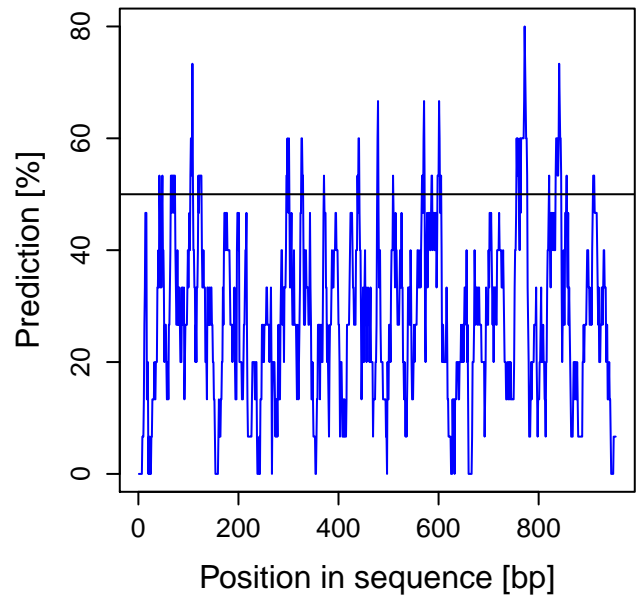

**MipA: MC1\_SP69\_04710**

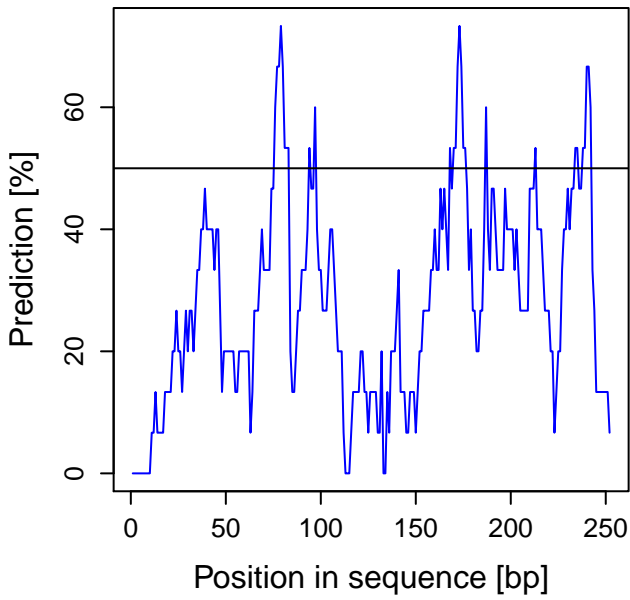

**MipA: MC6\_SQ01\_04155**

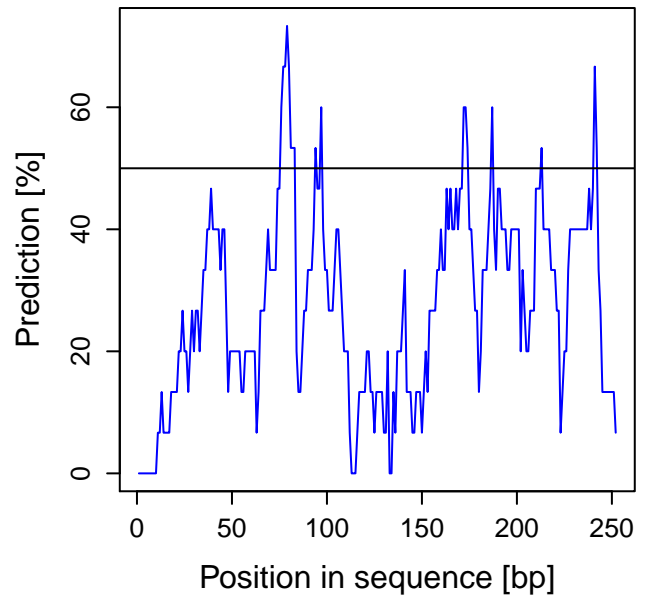

**MipA: MC8\_SQ02\_04180**

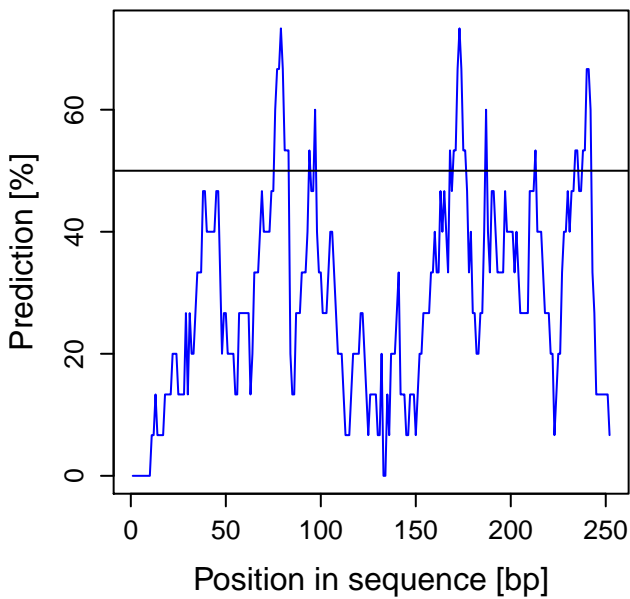

**OlpA: MC1\_SP69\_07895**

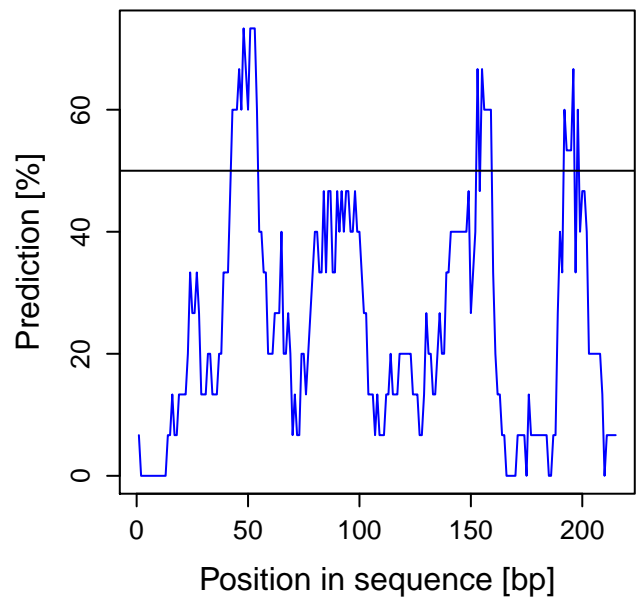

**OlpA: MC6\_SQ01\_01010**

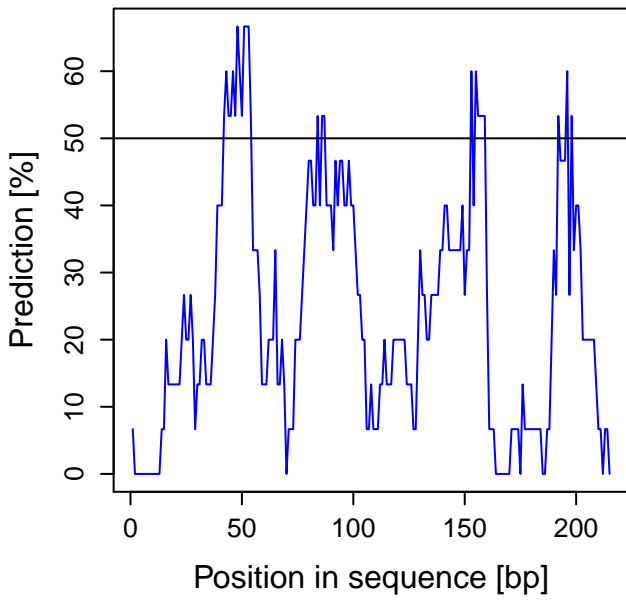

**OlpA: MC8\_SQ02\_01010**

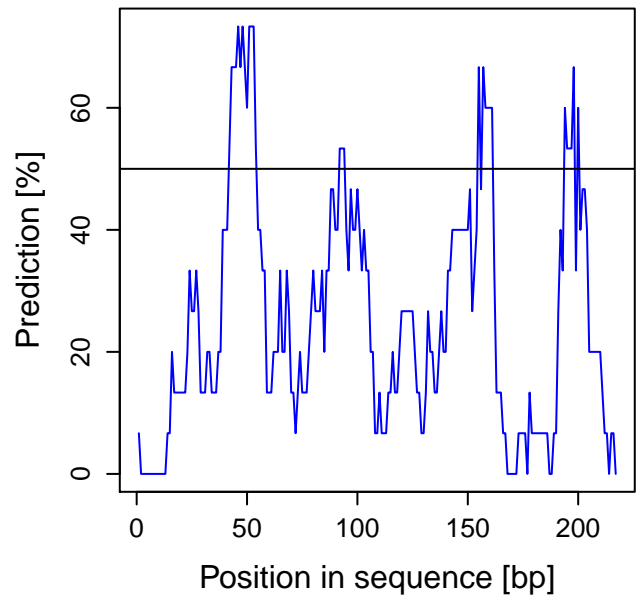

**OMPA\_J: MC1\_SP69\_01690,  
MC8\_SQ02\_07135**

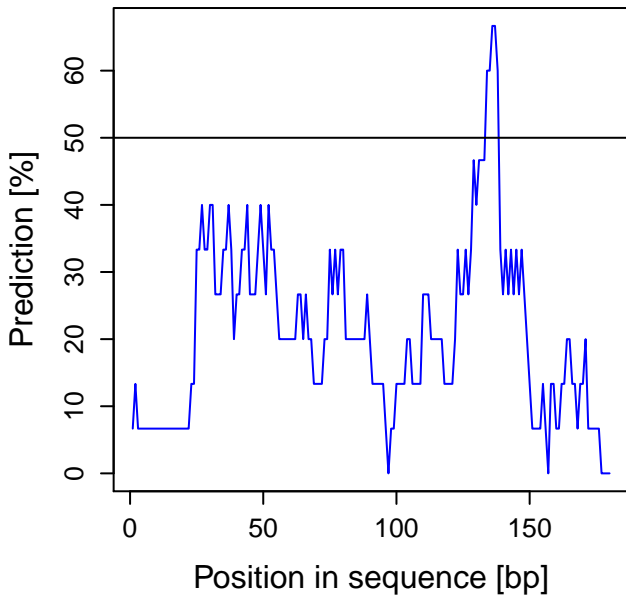

**OMPA\_J: MC6\_SQ01\_07075**

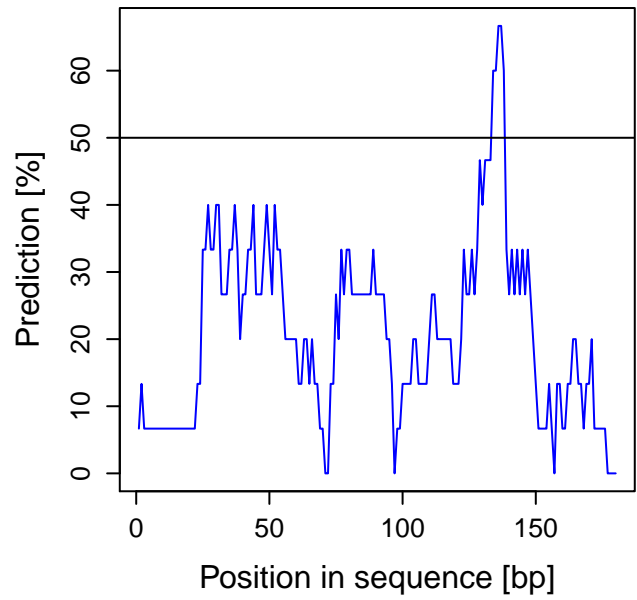

**OMP\_CD: MC1\_SP69\_07585,  
MC6\_SQ01\_01315**

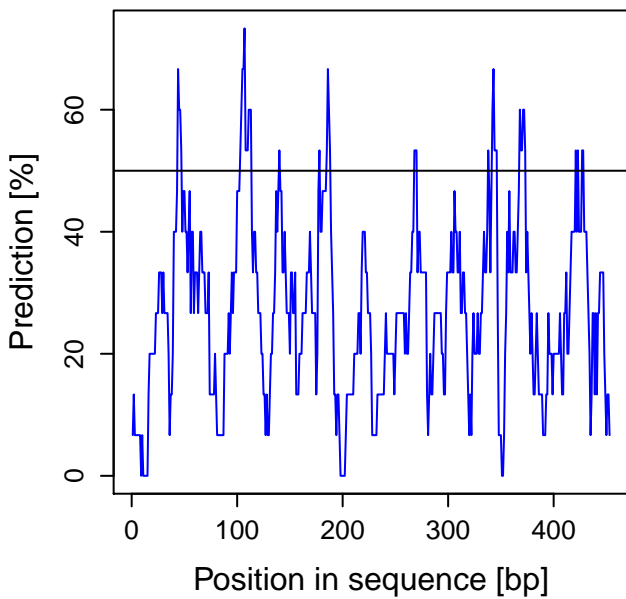

**OMP\_CD: MC8\_SQ02\_01320**

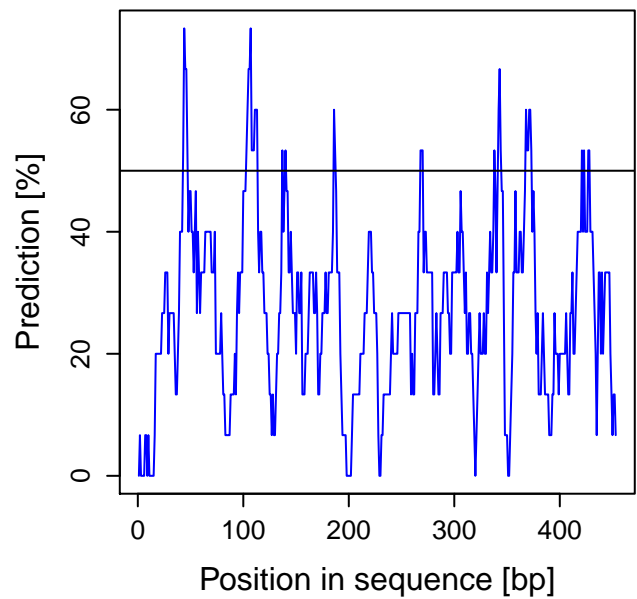

**OMP\_E: MC1\_SP69\_03870,  
MC6\_SQ01\_04940**

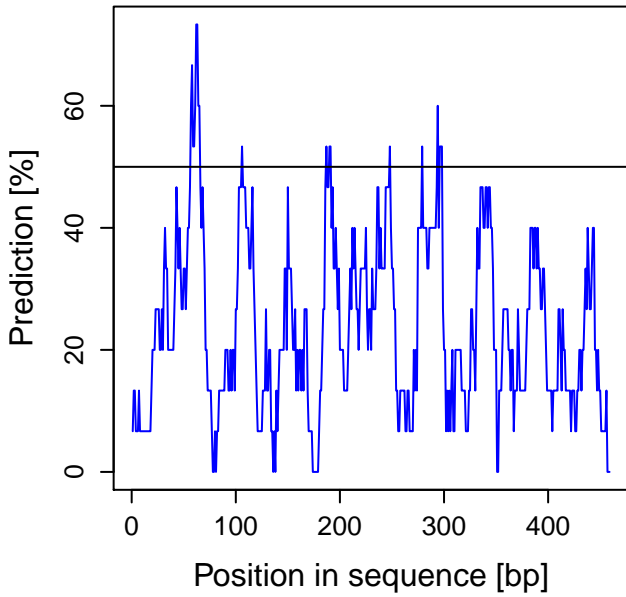

**OMP\_E: MC8\_SQ02\_04980**

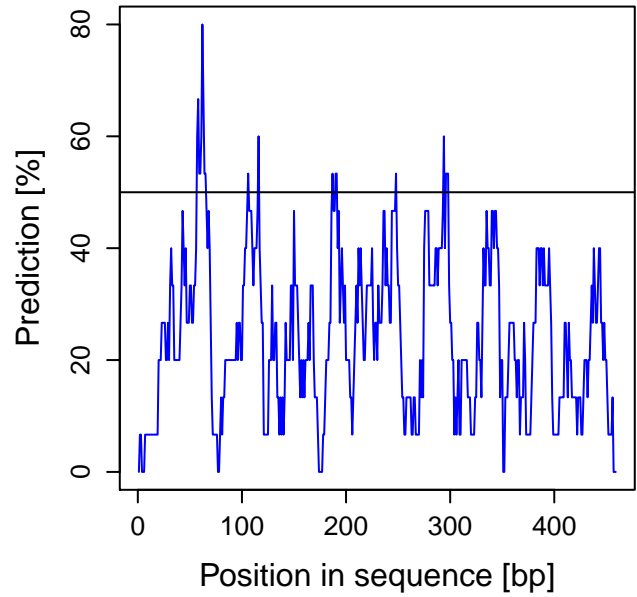

**OMP\_G1b: MC1\_SP69\_06250**

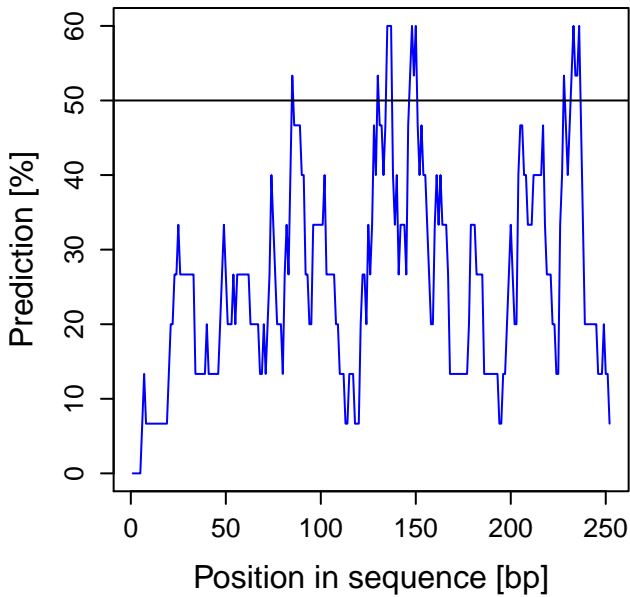

**OMP\_G1b: MC6\_SQ01\_02650**

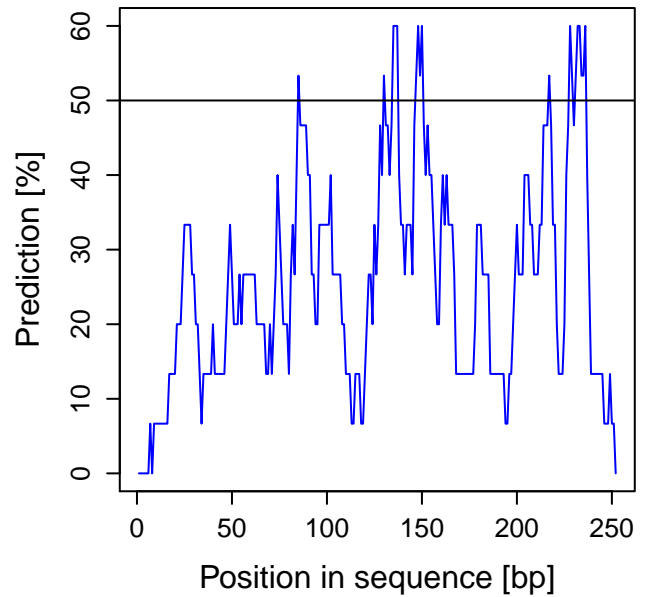

**OMP\_G1b: MC8\_SQ02\_02660**

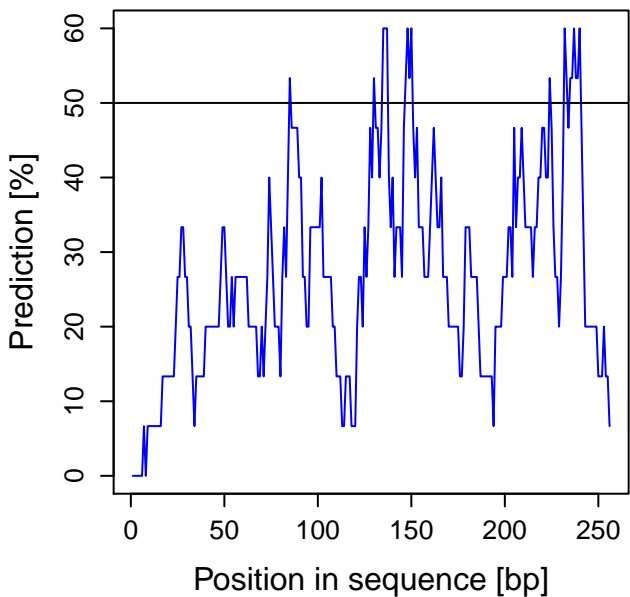

**OMP\_M35: MC1\_SP69\_05635,  
MC6\_SQ01\_03260, MC8\_SQ02\_03275**

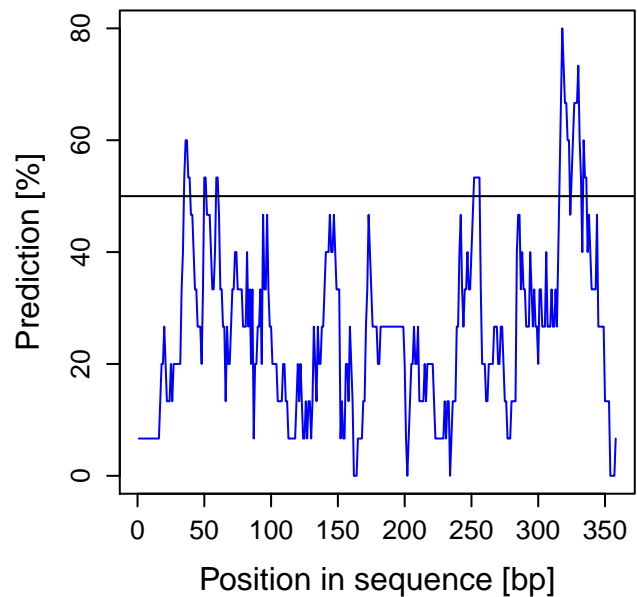

**TbpB: MC1\_SP69\_03100**

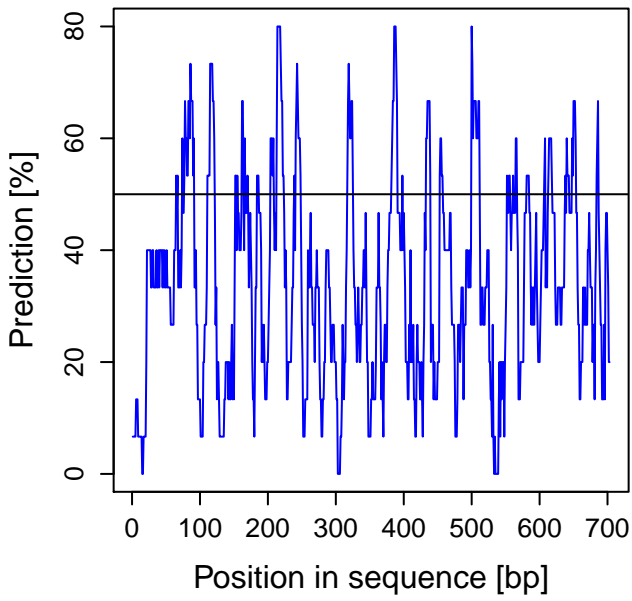

**TbpB: MC6\_SQ01\_05710**

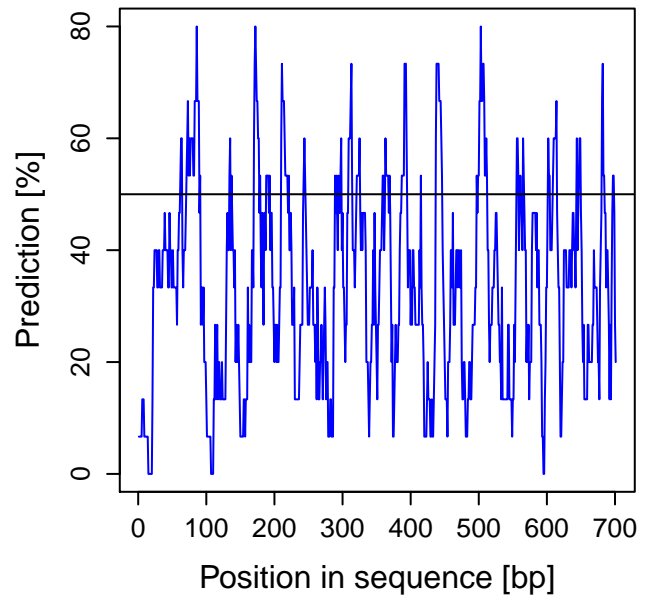

**TbpB: MC8\_SQ02\_05755**

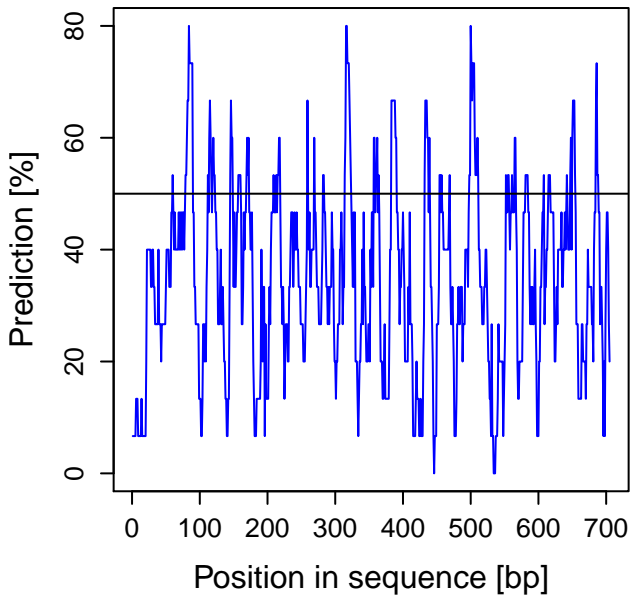

**UspA1: MC1\_SP69\_01520**

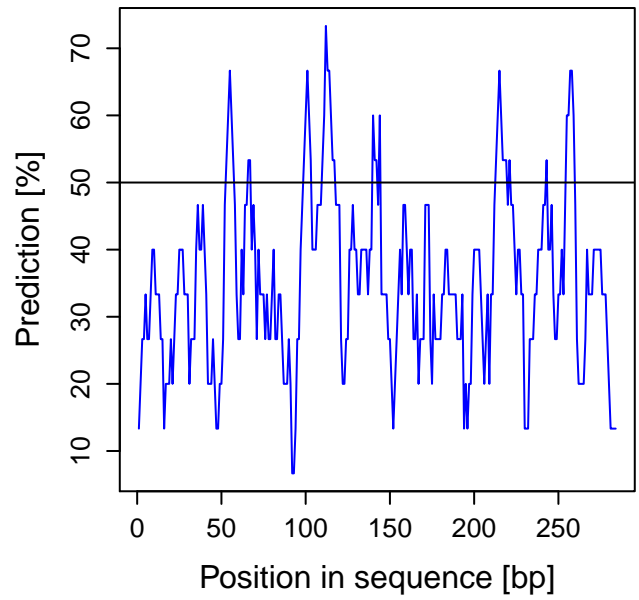

**UspA1: MC6\_SQ01\_03435**

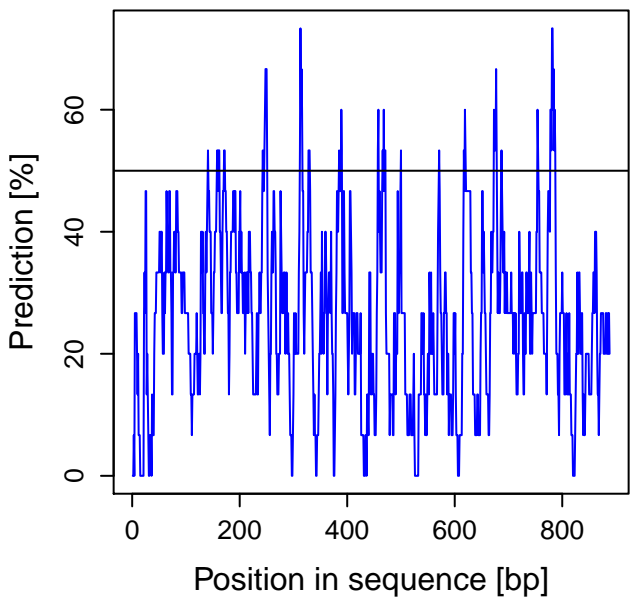

**UspA1: MC8\_SQ02\_03470**

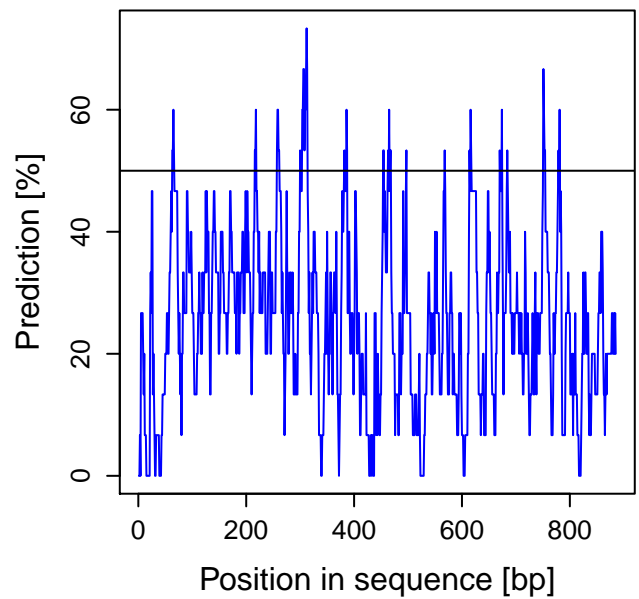



Ycel: MC1\_SP69\_02955,  
MC6\_SQ01\_05855, MC8\_SQ02\_05915

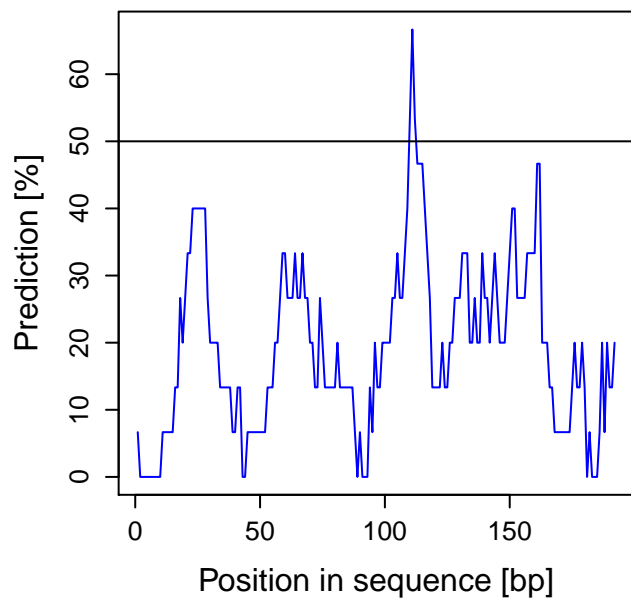

**Supplementary Fig. S4.** Prediction of individual sites as epitopes along sequences of proteins subjected to immunoproteomic studies from *Moraxella catarrhalis* strains MC1, MC6 and MC8. The prediction was calculated as percent of 15 methods, which recognized a given site involved in an epitope. Identical sequences were represented by one case.

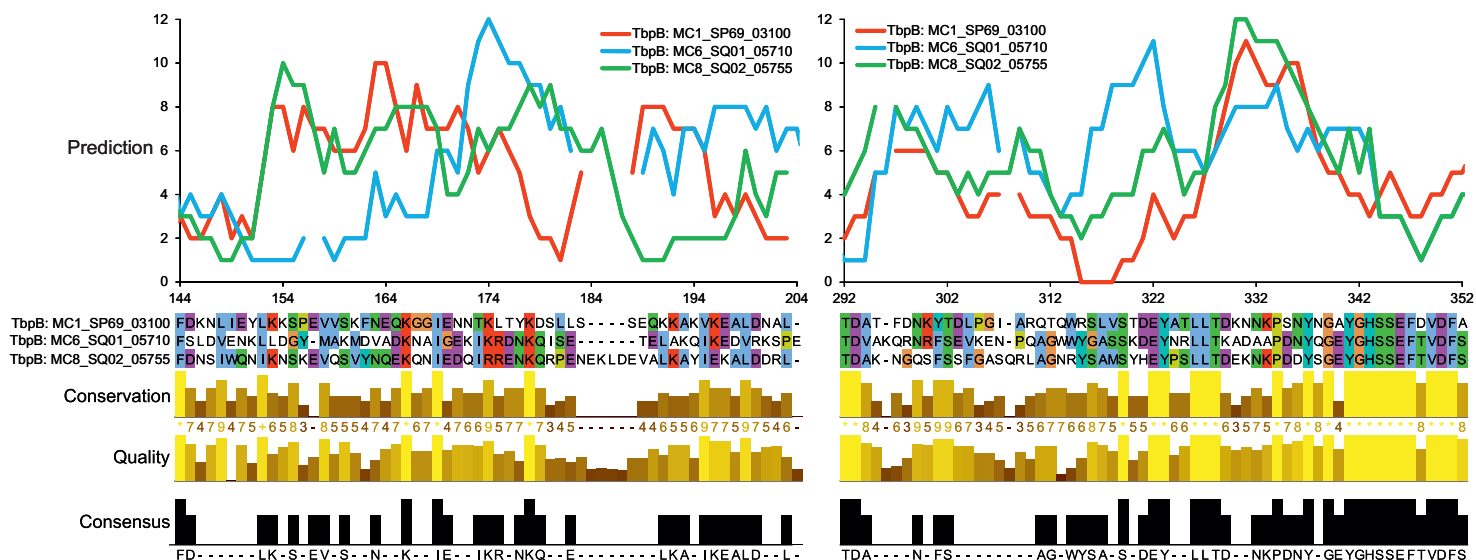

**Supplementary Fig. S5.** Sequence alignment of two regions in TbpB protein from *Moraxella catarrhalis* strains MC1, MC6 and MC8 and prediction of individual sites as epitopes in these sequences. The prediction was expressed as the number of 15 methods, which recognized a given site involved in an epitope. The alignment was prepared in JalView<sup>73</sup>.
